# Supplementary material for: U.S. Health Care Reform and Enduring Barriers to Mental Health Care Among Low-Income Adults With Psychological Distress
Source: Atypon-hosted journal article supplement (doi:10.1176/appi.ps.202000194), 2021-01-20
Supplement: appi.ps.202000194.ds001.pdf [file appi.ps.202000194.ds001.pdf]

**Appendix Table 1:** Socio-demographic characteristics, health insurance, and mental health service use in low-income adult participants of the National Survey on Drug Use and Health 2009-2013 and 2014-2018 with psychological distress.<sup>a</sup>

|                                        | 2009-2013<br>weighted % | 2014-2018<br>weighted % | AOR <sup>b</sup> | 95% CI <sup>b</sup> | <i>p</i> |
|----------------------------------------|-------------------------|-------------------------|------------------|---------------------|----------|
| <b>Sex</b>                             |                         |                         |                  |                     |          |
| Female                                 | 65.6                    | 66.0                    | --               | --                  | --       |
| Male                                   | 34.4                    | 34.0                    | .98              | .88-1.09            | .692     |
| <b>Race/ethnicity<sup>c</sup></b>      |                         |                         |                  |                     |          |
| Non-Hispanic white                     | 53.9                    | 53.7                    | 1.01             | .91-1.12            | .852     |
| Non-Hispanic black                     | 19.4                    | 17.9                    | .91              | .79-1.04            | .146     |
| Hispanic                               | 20.1                    | 20.2                    | .96              | .85-1.17            | .953     |
| Other                                  | 6.7                     | 8.1                     | 1.21             | 1.00-1.47           | .047     |
| <b>Age, years<sup>d</sup></b>          |                         |                         |                  |                     |          |
| 18-25                                  | 30.1                    | 32.2                    | 1.09             | .99-1.20            | .076     |
| 26-34                                  | 19.4                    | 18.9                    | .97              | .86-1.09            | .629     |
| 35-49                                  | 26.3                    | 23.8                    | .88              | .80-.97             | .013     |
| ≥50                                    | 24.3                    | 25.2                    | 1.05             | .90-1.24            | .513     |
| <b>County of residence<sup>e</sup></b> |                         |                         |                  |                     |          |
| Large metropolitan                     | 46.5                    | 47.2                    | 1.03             | .91-1.16            | .634     |
| Small metropolitan                     | 33.2                    | 33.7                    | 1.02             | .89-1.17            | .777     |
| Non-metropolitan                       | 20.3                    | 19.1                    | .93              | .80-1.08            | .347     |
| <b>Health insurance<sup>f</sup></b>    |                         |                         |                  |                     |          |
| Medicaid                               | 43.9                    | 52.6                    | 1.48             | 1.32-1.65           | <.001    |
| Medicare                               | 16.6                    | 16.4                    | .99              | .82-1.18            | .885     |
| Private insurance                      | 18.0                    | 21.9                    | 1.25             | 1.09-1.42           | .001     |
| Other health insurance                 | 22.1                    | 22.2                    | 1.00             | .87-1.16            | .953     |
| Any health insurance                   | 70.9                    | 81.5                    | 1.81             | 1.61-2.04           | <.001    |
| <b>Any mental health service use</b>   | 45.6                    | 46.4                    | 1.04             | .92-1.18            | .496     |

<sup>a</sup> n=7,834 in 2009-2013 and n=8,134 in 2014-2018.

<sup>b</sup> Adjusted odds ratio (AOR) and confidence interval (CI) from logistic regression comparing years 2009-2013 and 2014-2018. The regression models adjusted for age, sex, race/ethnicity, and urbanicity of residence (large metropolitan, small metropolitan and non-metropolitan area residence). Models further adjusted for survey weight, clustering, and stratification.

<sup>c</sup> Each racial/ethnic group was compared with the others combined.

<sup>d</sup> Each age group was compared with the other age groups combined.

<sup>e</sup> Each county type was compared with the other county types combined.

<sup>f</sup> Health insurance categories are not mutually exclusive. Individuals may be covered by more than one type of insurance.

**Appendix Table 2:** Barriers to needed mental health care in low-income adult participants of the National Survey on Drug Use and Health 2009-2013 and 2014-2018<sup>a</sup> with psychological distress who reported not having used mental health services and who perceived an unmet need for mental health care in the past year.

|                                                                                                                                                  | 2009-2013<br>weighted % | 2014-2018<br>weighted % | AOR <sup>b</sup> | 95% CI <sup>b</sup> | <i>p</i> |
|--------------------------------------------------------------------------------------------------------------------------------------------------|-------------------------|-------------------------|------------------|---------------------|----------|
| Which of these statements explain why you did not get the mental health treatment or counseling you needed?                                      |                         |                         |                  |                     |          |
| <b>Financial barriers</b>                                                                                                                        |                         |                         |                  |                     |          |
| You couldn't afford the cost.                                                                                                                    | 52.4                    | 46.6                    | .79              | .59-1.06            | .120     |
| Your health insurance does not cover any mental health treatment or counseling.                                                                  | 3.6                     | 6.1                     | 1.75             | 1.11-2.77           | .017     |
| Your health insurance does not pay enough for mental health treatment or counseling.                                                             | 6.1                     | 9.9                     | 1.70             | .95-3.06            | .075     |
| Any financial reason                                                                                                                             | 56.3                    | 51.3                    | .82              | .61-1.10            | .177     |
| <b>Attitudinal barriers</b>                                                                                                                      |                         |                         |                  |                     |          |
| You didn't think treatment would help.                                                                                                           | 4.2                     | 6.6                     | 1.64             | 1.10-2.46           | .017     |
| You thought you could handle the problem without treatment.                                                                                      | 14.3                    | 16.1                    | 1.16             | .87-1.56            | .307     |
| You didn't think you needed treatment at the time                                                                                                | 5.2                     | 5.3                     | 1.03             | .64-1.65            | .900     |
| You were concerned that you might be committed to a psychiatric hospital or might have to take medicine.                                         | 11.1                    | 16.1                    | 1.55             | 1.09-2.20           | .015     |
| You were concerned that the information you gave the counselor might not be kept confidential.                                                   | 11.1                    | 10.1                    | .90              | .59-1.38            | .633     |
| You were concerned that getting mental health treatment or counseling might have a negative effect on your job.                                  | 9.1                     | 12.1                    | 1.40             | .90-2.19            | .134     |
| You were concerned that getting mental health treatment or counseling might cause your neighbors or community to have a negative opinion of you. | 8.3                     | 10.9                    | 1.36             | .89-2.09            | .155     |
| You didn't want others to find out that you needed treatment.                                                                                    | 4.6                     | 4.9                     | 1.08             | .73-1.58            | .707     |
| Any attitudinal reasons                                                                                                                          | 37.9                    | 44.7                    | 1.35             | 1.03-1.77           | .031     |
| <b>Structural barriers</b>                                                                                                                       |                         |                         |                  |                     |          |
| You did not know where to go to get services.                                                                                                    | 24.0                    | 31.3                    | 1.45             | 1.09-1.94           | .012     |
| You didn't have time (because of job, childcare, or other commitments).                                                                          | 8.1                     | 11.4                    | 1.48             | 1.07-2.05           | .017     |
| You had no transportation, or treatment was too far away, or the hours were not convenient.                                                      | 4.9                     | 6.5                     | 1.36             | .83-2.23            | .225     |
| Any structural reasons                                                                                                                           | 32.6                    | 41.3                    | 1.46             | 1.11-1.92           | .006     |
| More than 1 barrier                                                                                                                              | 28.3                    | 38.9                    | 1.65             | 1.24-2.20           | .001     |

<sup>a</sup> n=1,069 in 2009-2013 and n=988 in 2014-2018.

<sup>b</sup> Adjusted odds ratio (AOR) and confidence interval (CI) from logistic regression comparing years 2009-2013 and 2014-2018. The regression model adjusted for age, sex, race/ethnicity, and urbanicity of residence (large metropolitan, small metropolitan and non-metropolitan area residence). Models further adjusted for survey weight, clustering, and stratification.
